# Supplementary material
Source: publisher figshare collection journal article supplement (https://acs.figshare.com/ndownloader/files/12459650)
Supplement: Supplementary file 1 [file 12459650]

# Excited-State Electronic Asymmetry Prevents Photoswitching in Terthiophene Compounds (Supporting Information)

Benjamin H. Strudwick,<sup>\*,†</sup> Jing Zhang,<sup>‡</sup> Michiel F. Hilbers,<sup>†</sup> Wybren Jan  
Buma,<sup>†</sup> Sander Woutersen,<sup>†</sup> Sheng Hua Liu,<sup>‡</sup> and František Hartl<sup>\*,¶</sup>

E-mail: b.h.strudwick@uva.nl; f.hartl@reading.ac.uk

---

<sup>\*</sup>To whom correspondence should be addressed

<sup>†</sup>Molecular Photonics Group, Van 't Hoff Institute for Molecular Sciences, University of Amsterdam, Science Park 904, 1098 XH Amsterdam, The Netherlands

<sup>‡</sup>Key Laboratory of Pesticide and Chemical Biology, Ministry of Education, College of Chemistry, Central China Normal University, Wuhan 430079, P.R. China

<sup>¶</sup>Department of Chemistry, University of Reading, Whiteknights, Reading RG6 6AD, United Kingdom

# Supporting Information

## Table of Contents

S1. Photo-oxidisation of 1b Spectra

S2. Steady State Spectra

S3. UV/vis Transient Absorption Spectra of 1a

S4. DFT & TD-DFT Calculations

S5. Global Fitting for the Nanosecond Transient Absorption Spectra

S6. NMR & NOESY Spectra of 1a

S7. Femtosecond Transient Absorption Spectra of 1b in THF

## S1. Photo-oxidisation of **1b** Spectra

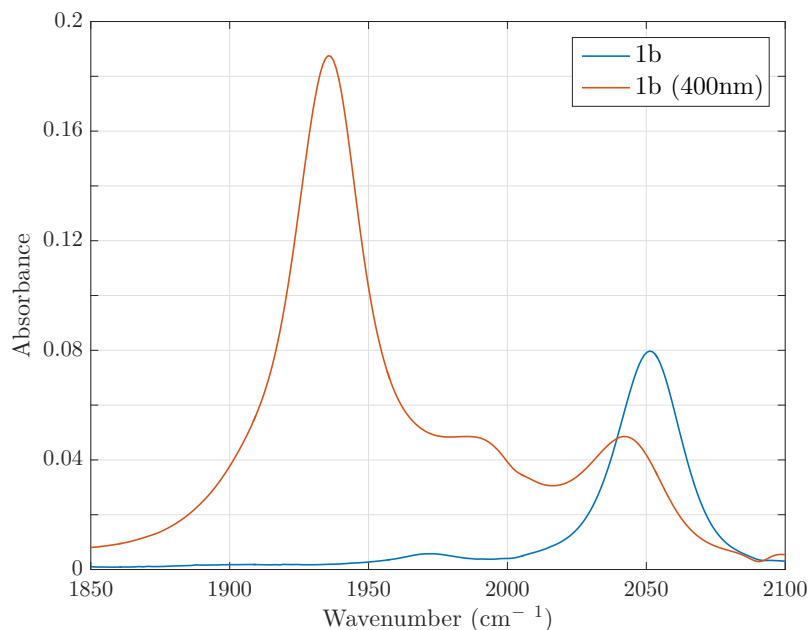

Figure S1: IR absorption spectra of **1b** in DCM before (blue) and after being irradiated with light ( $\lambda = 400$  nm) for 5 minutes (red). The latter clearly demonstrates the formation of **1b**<sup>+</sup>.<sup>S1</sup>

The spectra shown in **Figures S1** and **S2** are IR absorption spectra (using a Bruker Vertex 70 FTIR spectrometer) of **1b** before and after irradiation with light ( $\lambda = 400$  nm). **Figure S1** shows the spectral region of the ethynyl mode; after irradiation the three modes can be seen to separate. **Figure S2** shows the NIR spectral region where a strong electronic transition can be seen for the irradiated **1b**. The same sample was then measured in the UV/vis region, **Figure S3**, (using a Hewlett Packard 8453 UV/vis spectrophotometer) where a new species (at 720 nm) is easily distinguishable. The species formed was assigned to be **1b**<sup>+</sup> comparing with the spectra from the spectro-electrochemical studies.<sup>S1</sup>

**Figure S4** shows the time-resolved IR measurements of **1b** in DCM on a ps time scale. After irradiation with light ( $\lambda = 400$  nm) **1b** converts to **1b**<sup>+</sup> within the first nanosecond. The rapid oxidation rules out simple diffusion of photogenerated chlorine radicals, which would take place on the nanosecond time scale.

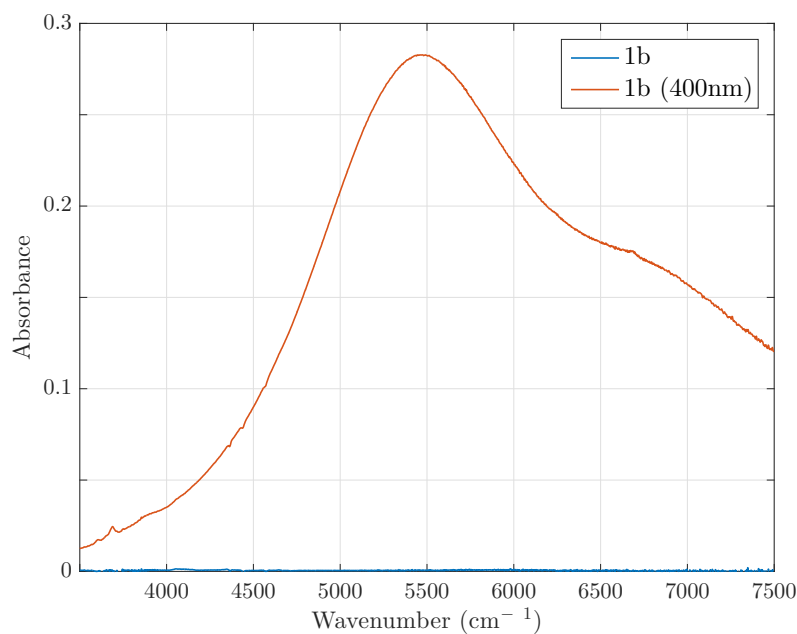

Figure S2: Electronic absorption spectra of **1b** in DCM before (blue) and after being irradiated with light ( $\lambda = 400$  nm) for 5 minutes (red). The latter reproduces the NIR absorption of **1b**<sup>+</sup>.<sup>S1</sup>

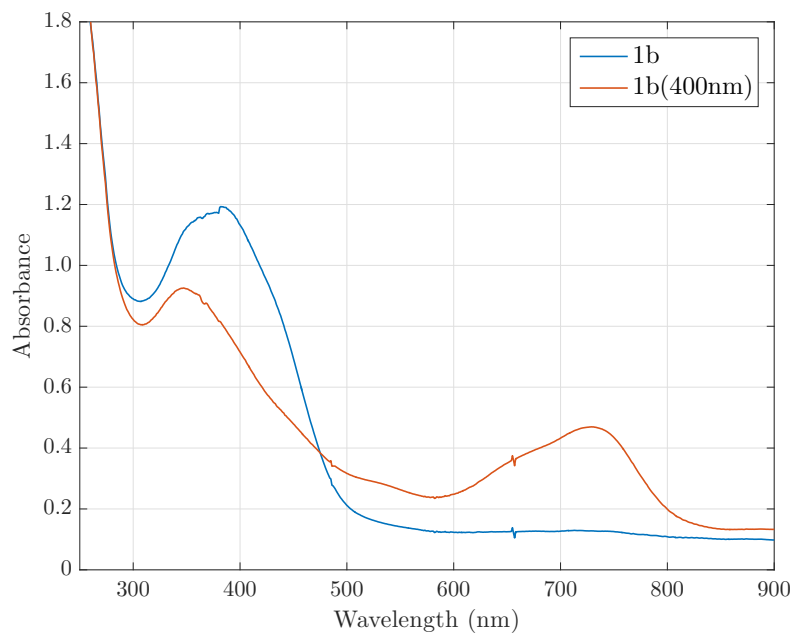

Figure S3: Steady state UV/vis spectra (using a Hewlett Packard 8453 UV/vis spectrophotometer) of **1b** in DCM before (blue) and after being irradiated with light ( $\lambda = 400$  nm) for 5 minutes (red). The electronic absorption at 720 nm (red) belongs to **1b**<sup>+</sup>.<sup>S1</sup>

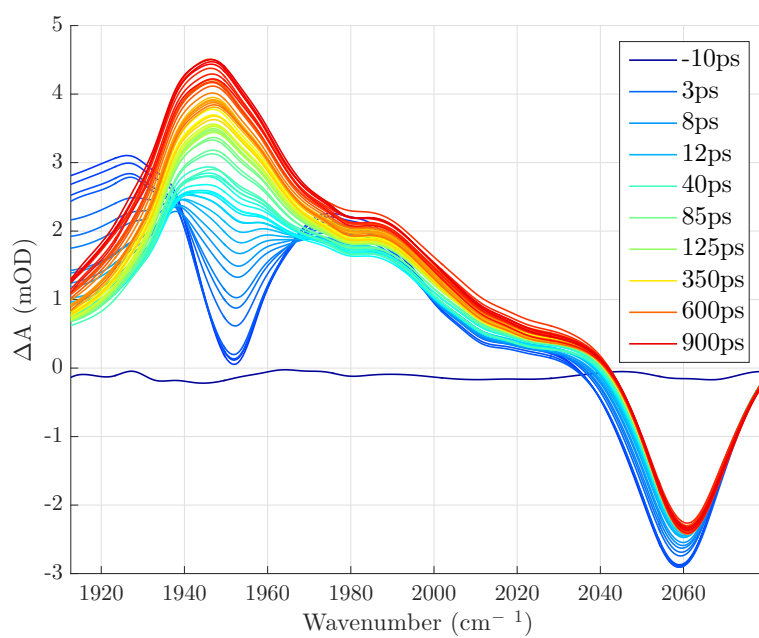

Figure S4: TR-IR spectra of **1b** in DCM, excited at ca. 400 nm, upon continual circulation of the solution to ensure a fresh sample.

## S2. Steady State Spectra

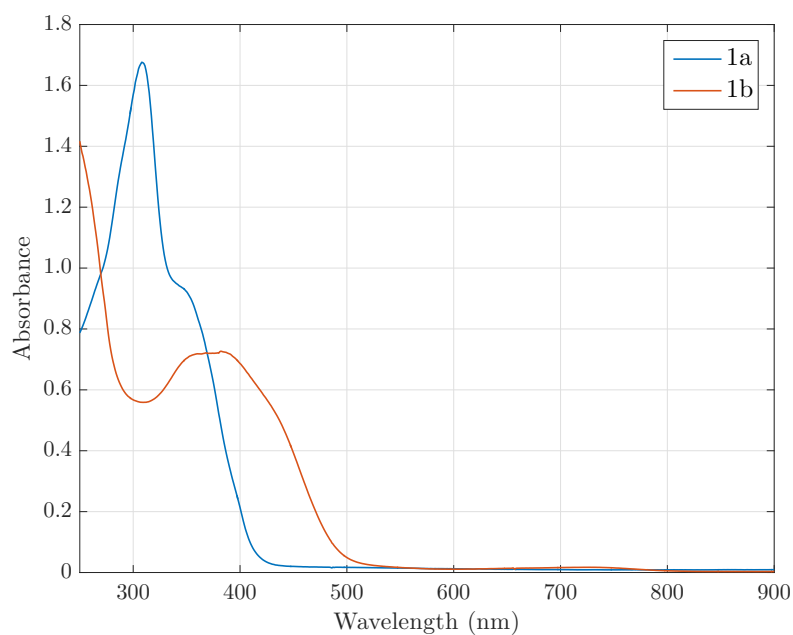

Figure S5: Steady-state UV/vis absorption spectra of **1a** and **1b** in THF (using a Hewlett Packard 8453 UV/vis spectrophotometer).

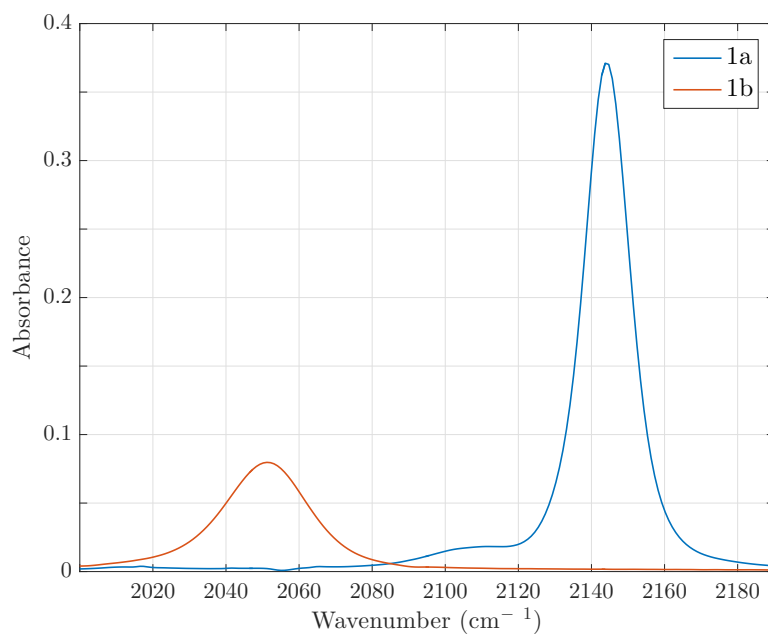

Figure S6: IR absorption spectra showing the ethynyl stretching modes of **1a** and **1b** in THF (using a Bruker Vertex 70 FTIR spectrometer).

### S3. UV/vis Transient Absorption Spectra of **1a**

UV/vis transient absorption spectra of **1a** in DCM, irradiated with light ( $\lambda = 400$  nm), are shown in **Figures S7** and **S8**. The spectra show a final long lived state that lasts till the end of the accessible time range. This final feature can be continued to be followed in the nanosecond TA measurement, **Figure S8**, where **1a** returns to the GS. Comparing **Figures S7** and **S8** with the UV/vis TA experiments in THF, **Figures 3** and **4**, shows no difference between the decay pathway of **1a** in THF and DCM. **Figure S9** presents the decay-associated spectra of the picosecond UV/vis TA of **1a** in THF provided in **Figure 3**. There are three species seen within the first 4 ns after excitation; an initial species  $S^*$  associated with the hot singlet state, the relaxed singlet state  $S$  and the triplet state  $T$ .

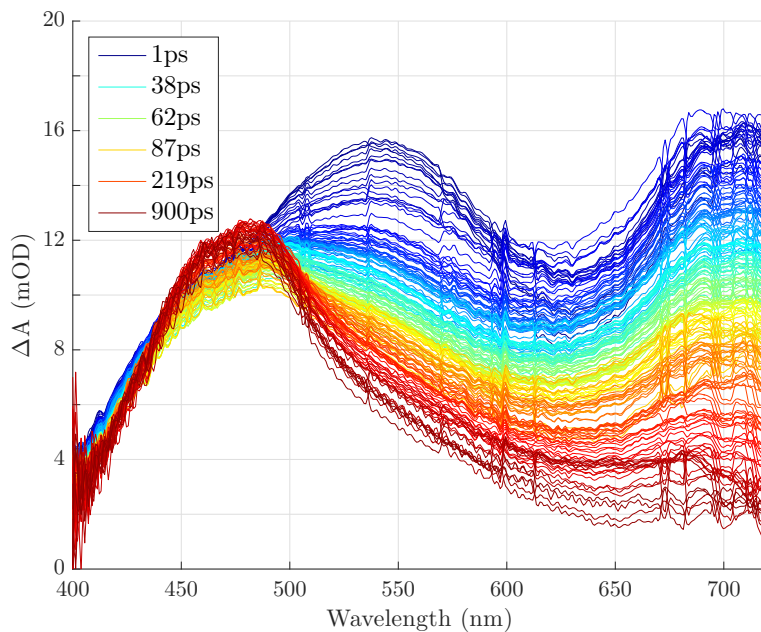

Figure S7: Femtosecond TA spectra of **1a** in DCM, excited at ca. 400 nm.

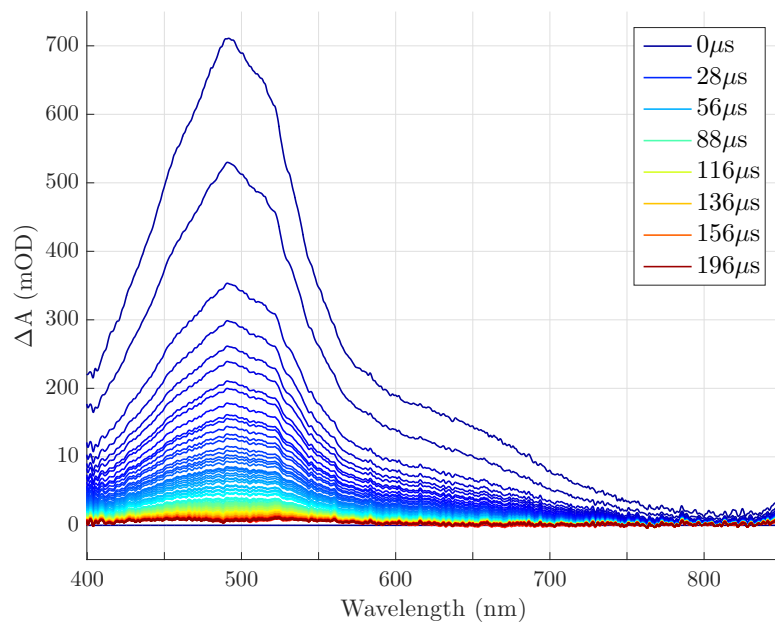

Figure S8: Nanosecond TA spectra of **1a** in DCM, excited at ca. 400 nm.

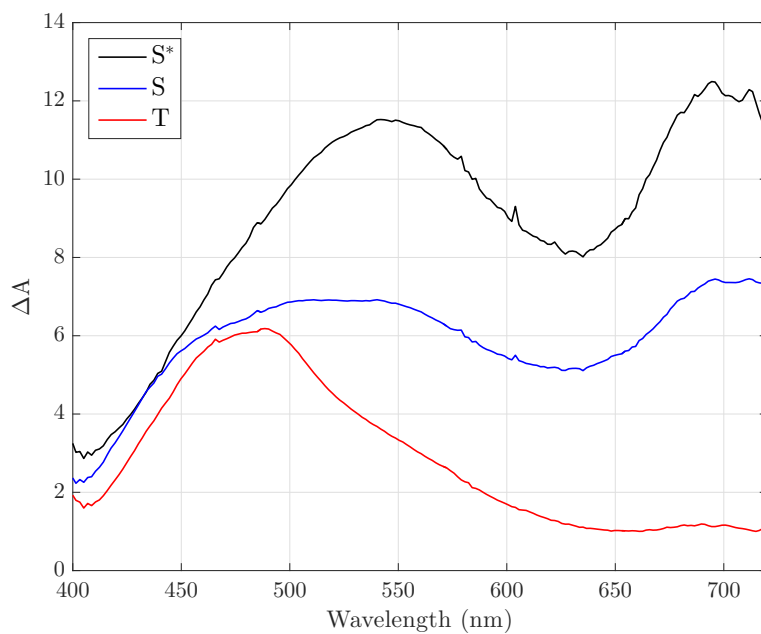

Figure S9: Femtosecond visible transient decay-associated spectra (DAS) of **1a** in THF, excited at ca. 400 nm. They refer to **Figure 3** in the main text.



## S4. DFT & TD-DFT Calculations

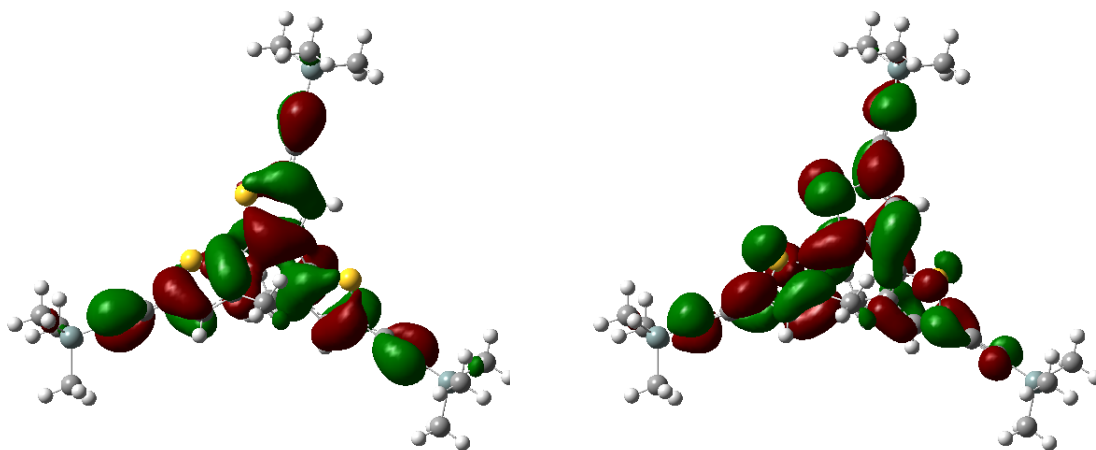

Figure S10: Left: The DFT-calculated HOMO of **1a**. Right: The DFT-calculated LUMO of **1a**. HOMO energy: -0.20363 a.u. (-5.54104 eV). LUMO energy: -0.07259 a.u. (-1.97527 eV). LUMO/HOMO gap: 0.13104 a.u. (3.56577 eV). Contour values:  $\pm 0.02$  (e bohr<sup>-3</sup>)<sup>1/2</sup>

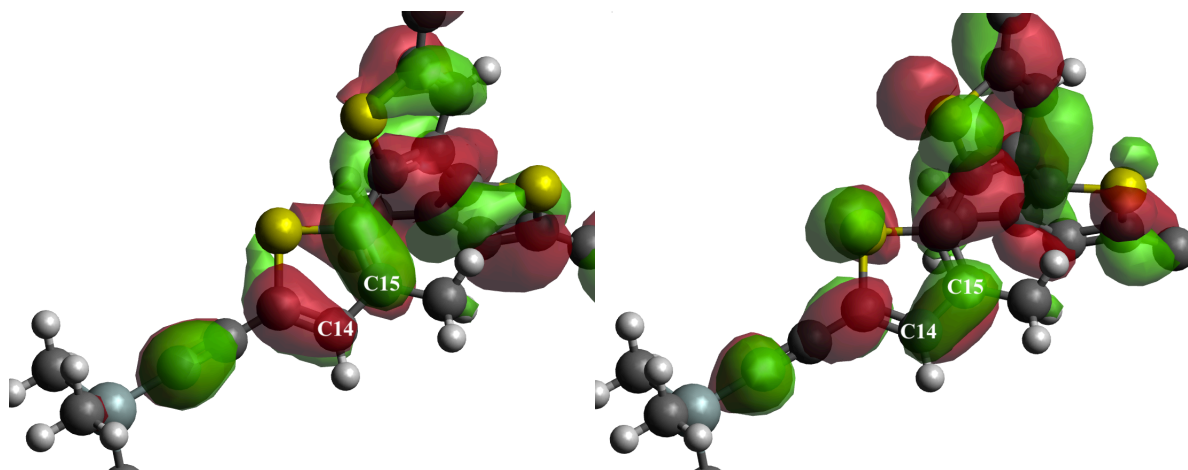

Figure S11: Left: The DFT-calculated HOMO of **1a**, focusing on the bond  $C_{14}-C_{15}$  (white). Right: The DFT-calculated LUMO of **1a**, focusing on the bond  $C_{14}-C_{15}$  (white).

**Figure S10** shows the calculated HOMO and LUMO of **1a** in the ground state. The geometry optimisation of the ground state of **1a** was performed at the Density Functional Theory level using the B3LYP functional and the 6-31G(d,p) basis set. The Polarizable Continuum Model (PCM) was adopted to describe solvation effects (solvent: dichloromethane). The HOMO is symmetrically spread across the whole compound. The LUMO shows to be more asymmetric, that is, delocalized predominantly over **e1** and **e2**, in **Figure 1**. The 30 lowest electronic transitions of **1a** are shown in **Figure S13**. The stick spectra, shown in black, have been convoluted with a Gaussian to produce the predicted spectra shown in blue. The predicted spectra and the measured UV/vis spectra of **1a**, shown in **Figure S5**, are in good agreement. **Table S1** contains the bond lengths for each of the states of **1a**; the ground state, the singlet state and the triplet state. **Figure S11** shows the same HOMO and LUMO as in **Figure S10** however, focused on the bond  $C_{14}-C_{15}$  ( $C_{15}$  is the potentially reactive carbon). The difference between the HOMO and LUMO points to a strong bond formation or a change in conjugation of this bond in the excited state.

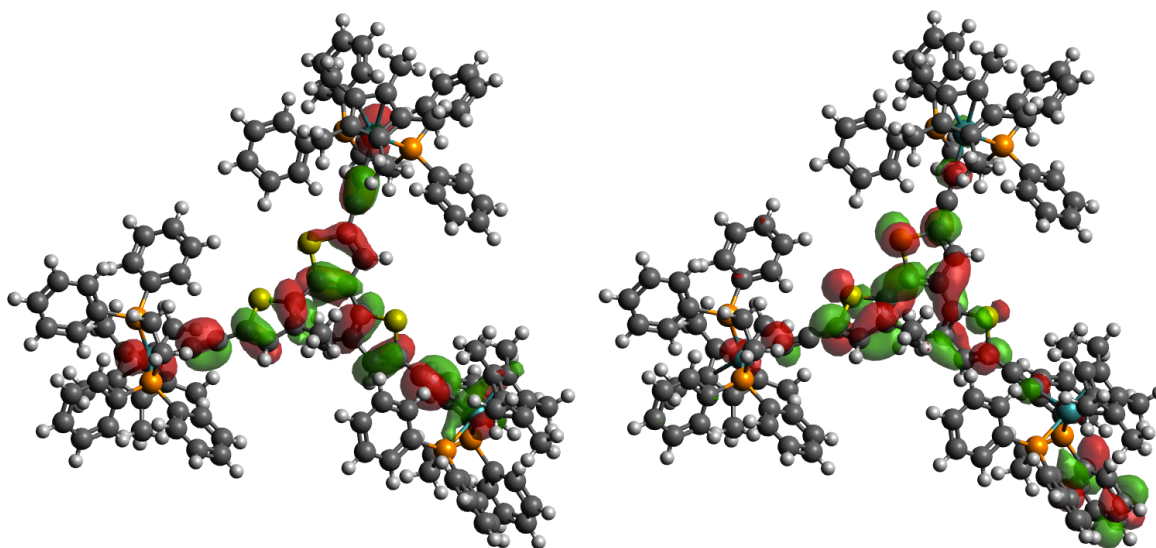

Figure S12: Left: The DFT-calculated HOMO of **1b**. Right: The DFT-calculated LUMO + 1 of **1b**. HOMO energy: -0.19068 a.u. (-5.18867 eV). LUMO + 1 energy: 0.01459 a.u. (0.397014 eV). LUMO + 1/HOMO gap: 0.20527 a.u. (5.5857 eV). Contour values:  $\pm 0.02$  ( $e \text{ bohr}^{-3}$ )<sup>1/2</sup>

**Figure S12** shows the calculated HOMO and LUMO + 1 of **1b** in the ground state. The geometry optimisation of the ground state of **1b** was performed at the Density Functional Theory level, using the CAM-B3LYP functional and the LANL2DZ basis set. The HOMO is spread symmetrically across the whole compound. The LUMO + 1 is more asymmetric and shifted to one side of the compound. The 10 lowest electronic transitions of **1b** are shown in **Figure S14**. The stick spectra, shown in black, have been convoluted with a Gaussian to produce the predicted spectra shown in blue. The predicted spectra and the measured UV/vis spectra of **1b**, shown in **Figure S5**, are in good agreement. The calculations show that the main transition at 362 nm is HOMO  $\rightarrow$  LUMO + 1.

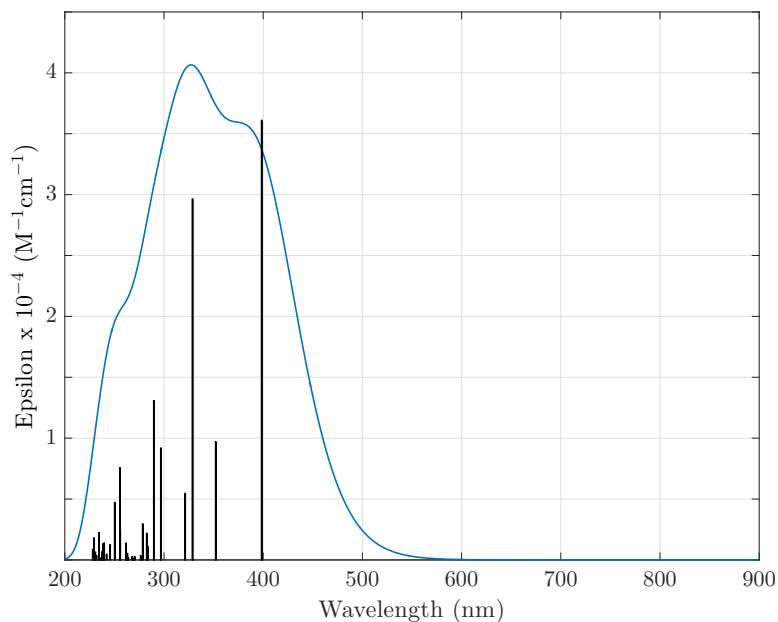

Figure S13: DFT-calculated 30 lowest electronic transitions (black stick spectrum) of **1a**. The 400 nm transition primarily belongs to HOMO  $\rightarrow$  LUMO). The predicted UV/vis spectrum is shown in blue.

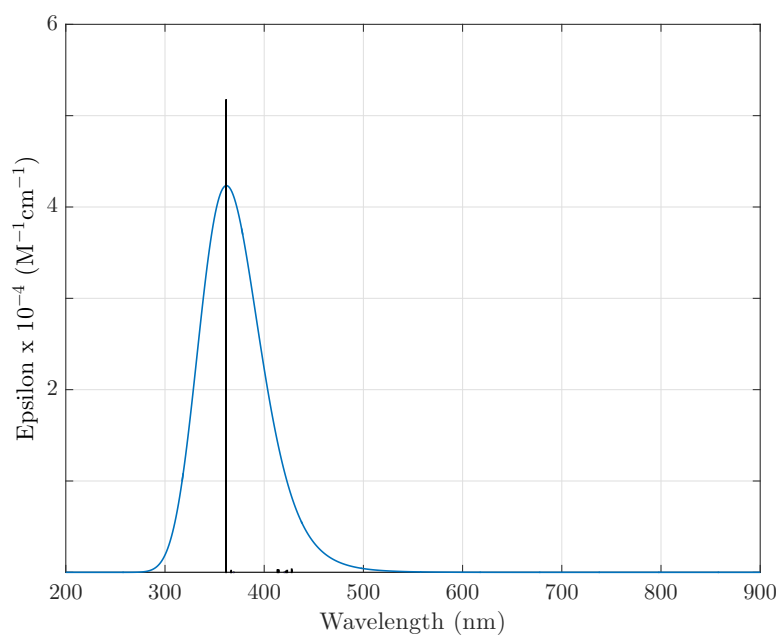

Figure S14: DFT-calculated 10 lowest electronic transitions (black stick spectrum) of **1b**. The 362 nm transition primarily belongs to HOMO  $\rightarrow$  LUMO + 1). The predicted UV/vis spectrum is shown in blue.

Table S1: The bond lengths from the DFT and TD-DFT calculations of the Ground (GS), Singlet (S) and Triplet (T, time - dependent) states for each bond labeled in **Figure 1**. The GS - S and GS - T columns show the difference between the bond lengths of **1a** in the Singlet or Triplet state compared with the Ground State, respectively. The differences in bond lengths relate to the differences in the structure of **1a** seen in **Figure 1** (GS) and **Figure 8** (S and T).

| Bond Lengths of <b>1a</b> (Å)     |         |         |         |          |          |
|-----------------------------------|---------|---------|---------|----------|----------|
| Bond                              | GS      | S       | T       | GS - S   | GS - T   |
| Si <sub>1</sub> - C <sub>11</sub> | 1.84807 | 1.84397 | 1.84782 | 0.0041   | 0.00025  |
| C <sub>11</sub> - C <sub>12</sub> | 1.22371 | 1.23262 | 1.23509 | -0.00891 | -0.01138 |
| C <sub>12</sub> - C <sub>13</sub> | 1.40887 | 1.38846 | 1.38062 | 0.02041  | 0.02825  |
| Si <sub>2</sub> - C <sub>21</sub> | 1.84919 | 1.84679 | 1.84941 | 0.0024   | -0.00022 |
| C <sub>21</sub> - C <sub>22</sub> | 1.22332 | 1.22901 | 1.23172 | -0.00569 | -0.0084  |
| C <sub>22</sub> - C <sub>23</sub> | 1.40922 | 1.39552 | 1.38761 | 0.0137   | 0.02161  |
| Si <sub>3</sub> - C <sub>31</sub> | 1.84708 | 1.84783 | 1.84797 | -0.00075 | -0.00089 |
| C <sub>31</sub> - C <sub>32</sub> | 1.2238  | 1.22749 | 1.22429 | -0.00369 | -0.00049 |
| C <sub>32</sub> - C <sub>33</sub> | 1.40917 | 1.39921 | 1.40761 | 0.00996  | 0.00156  |
| C <sub>13</sub> - C <sub>14</sub> | 1.37988 | 1.40685 | 1.42682 | -0.02697 | -0.04694 |
| C <sub>14</sub> - C <sub>15</sub> | 1.42376 | 1.392   | 1.37289 | 0.03176  | 0.05087  |
| C <sub>15</sub> - C <sub>16</sub> | 1.38682 | 1.43784 | 1.47323 | -0.05102 | -0.08641 |
| C <sub>23</sub> - C <sub>24</sub> | 1.39414 | 1.44741 | 1.47253 | -0.05327 | -0.07839 |
| C <sub>24</sub> - C <sub>25</sub> | 1.42985 | 1.41274 | 1.38745 | 0.01711  | 0.0424   |
| C <sub>25</sub> - C <sub>26</sub> | 1.37679 | 1.38628 | 1.41135 | -0.00949 | -0.03456 |
| C <sub>33</sub> - C <sub>34</sub> | 1.38423 | 1.40868 | 1.3899  | -0.02445 | -0.00567 |
| C <sub>34</sub> - C <sub>35</sub> | 1.42557 | 1.40826 | 1.42109 | 0.01731  | 0.00448  |
| C <sub>35</sub> - C <sub>36</sub> | 1.37911 | 1.39245 | 1.38263 | -0.01334 | -0.00352 |
| C <sub>16</sub> - C <sub>26</sub> | 1.45675 | 1.4011  | 1.37707 | 0.05565  | 0.07968  |
| C <sub>25</sub> - C <sub>36</sub> | 1.46938 | 1.43798 | 1.45901 | 0.0314   | 0.01037  |

## S5. Global Fitting for the Nanosecond Transient Absorption Spectra

Here is the model used to fit the spectra from the nanosecond visible transient absorption measurements visualised in **Figures 4** and **9**. Global analysis of the whole transient data matrix, assuming a sum of exponential time profiles and triplet-triplet annihilation was performed, using the model below:

$$a/(b * T + c) + d * \exp(-T/\tau) \tag{S1}$$

Here  $T$  represents time,  $\tau$  decay lifetime, and the other coefficients are concentration dependent. The first component models the triplet-triplet annihilation and the second component models the  $T \rightarrow GS$  transition, using a single exponential.

## S6. NMR & NOESY Spectra of 1a

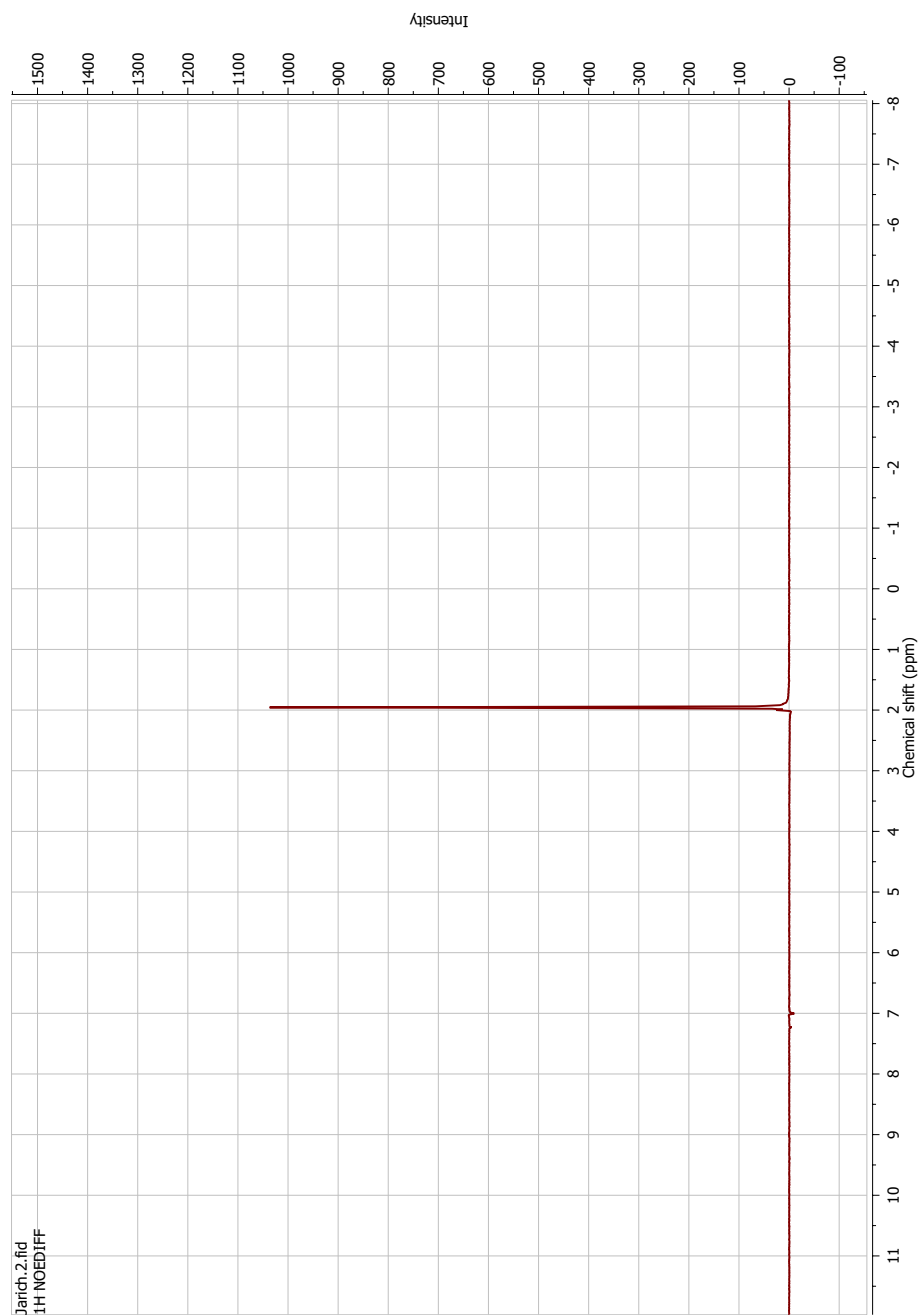

Figure S15:  $^1\text{H}$  NOESY spectrum (recorded on a Bruker Advance ARX 400, 400 MHz) of **1a** in  $\text{DCM-}d_2$  (purchased from Euriso-top) pulsed at 1.9 ppm, with no evidence of NOE resonance (see elsewhere), demonstrating that the methyl groups at the terthiophene core are distant and therefore in the anti-parallel conformation.

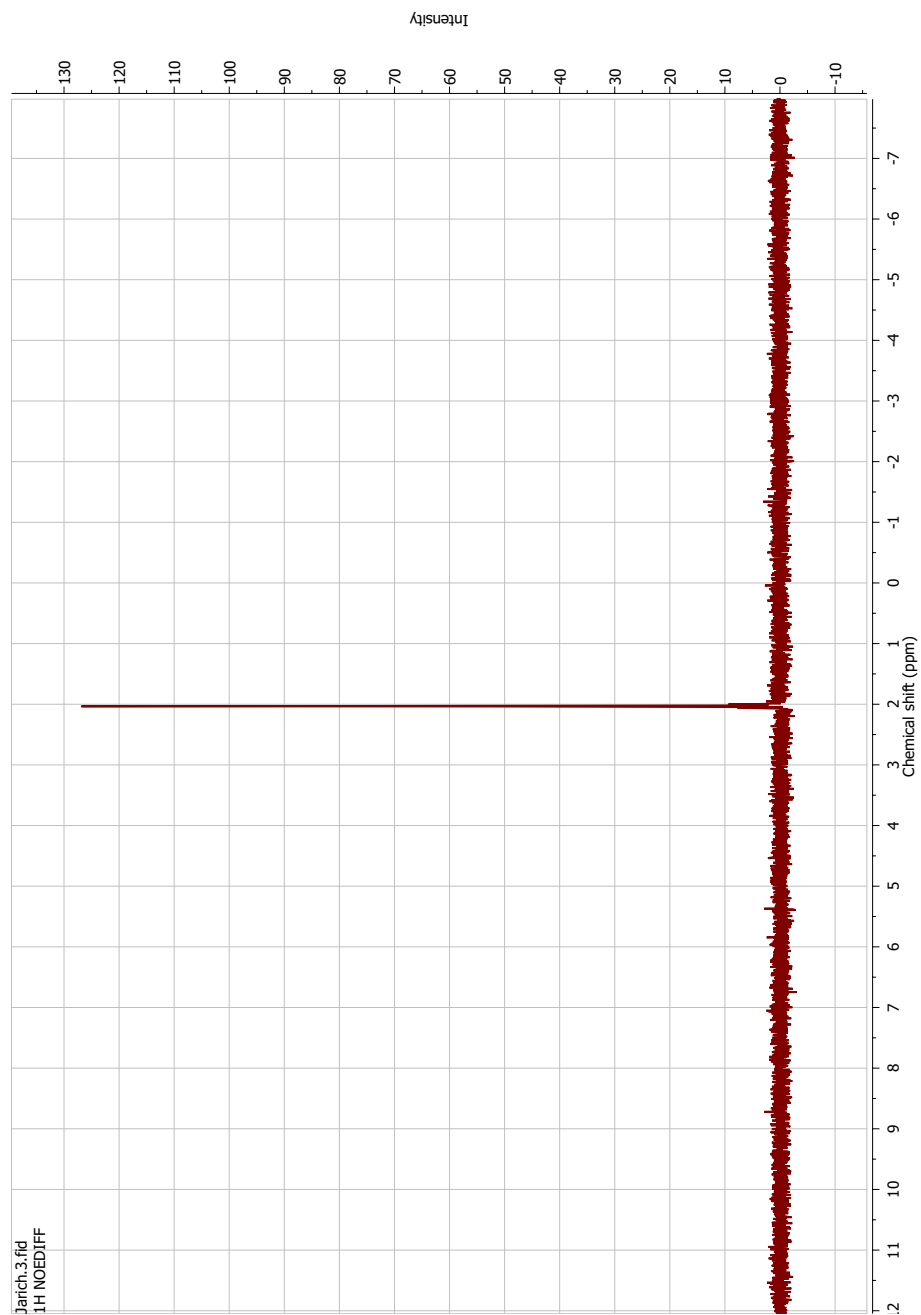

Figure S16:  $^1\text{H}$  NOESY spectrum (recorded on a Bruker Advance ARX 400, 400 MHz) of **1a** in  $\text{DCM-}d_2$  (purchased from Euriso-top) pulsed at 2.1 ppm, with no evidence of NOE resonance (see elsewhere), demonstrating that the methyl groups at the terthiophene core are distant and therefore in the anti-parallel conformation.



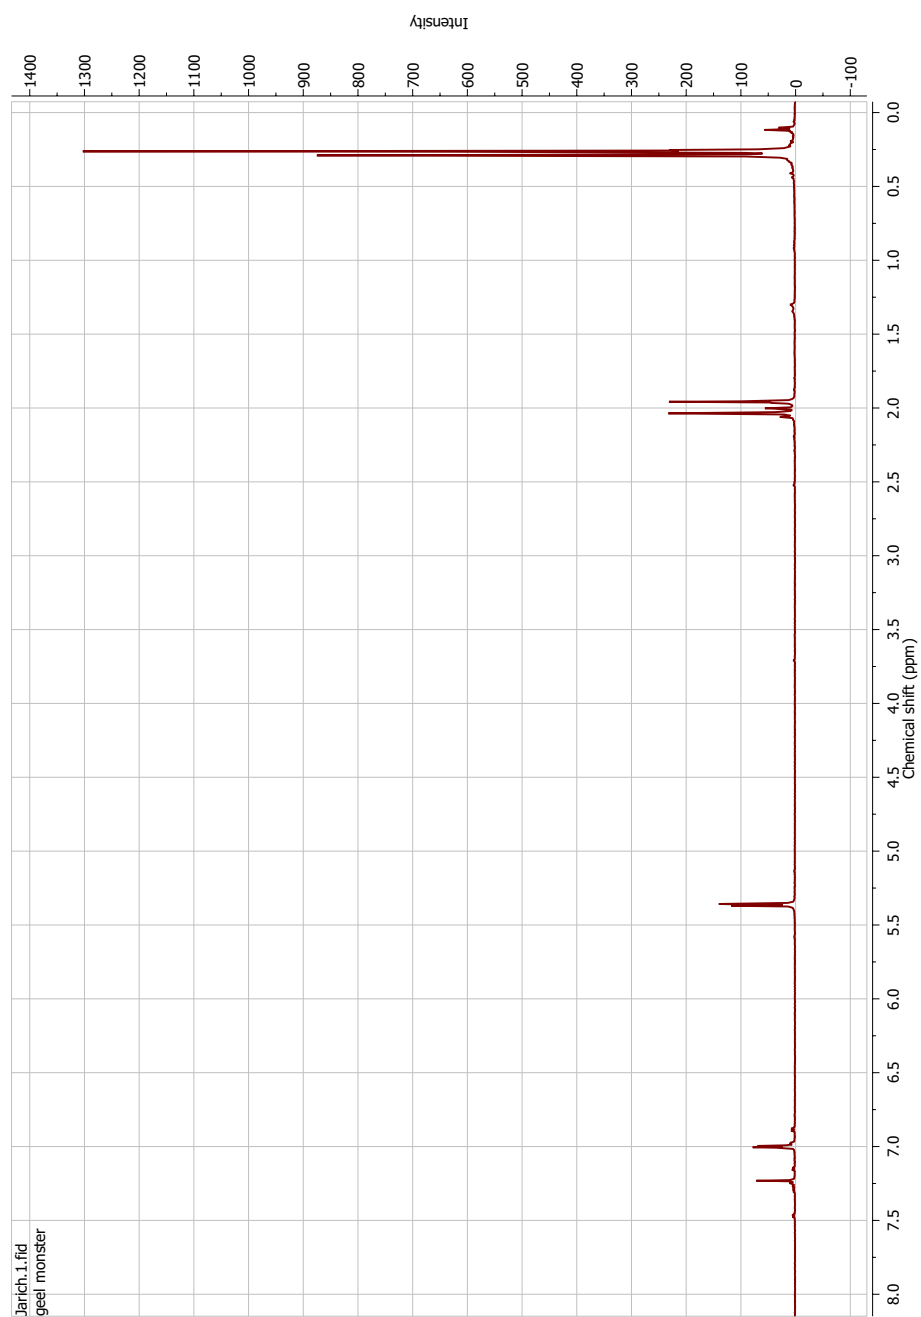

Figure S17:  $^1\text{H}$  NMR spectrum (recorded on a Bruker Advance ARX 400, 400 MHz) of **1a** in  $\text{DCM-}d_2$  (purchased from Euriso-top).

## S7. Femtosecond Transient Absorption Spectra of **1b** in THF

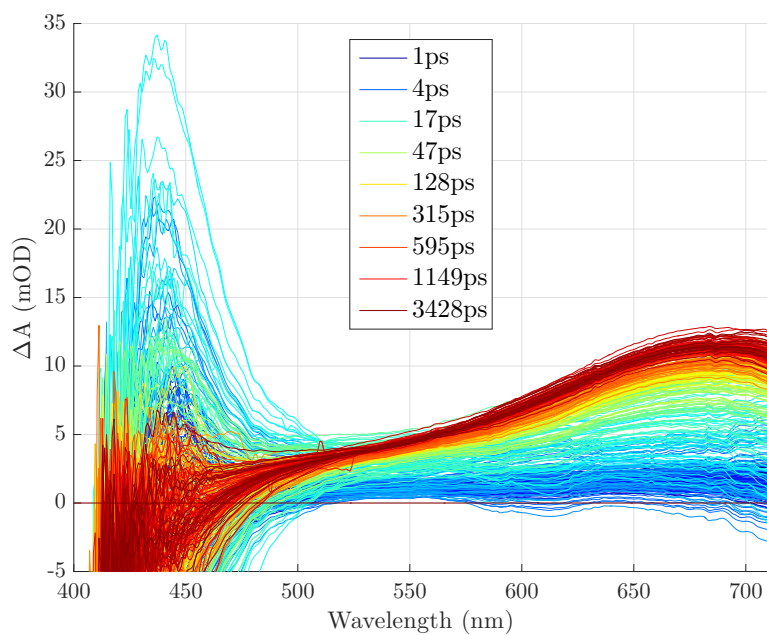

Figure S18: Femtosecond visible transient absorption spectra of **1b** in THF, excited at ca. 400 nm.

## References

- [S1] Zhang, J.; Sun, C.-F.; Zhang, M.-X.; Hartl, F.; Yin, J.; Yu, G.-A.; Rao, L.; Liu, S. H. Asymmetric oxidation of vinyl- and ethynyl terthiophene ligands in triruthenium complexes. *Dalton Trans.* **2016**, *45*, 768–782.
